# Supplementary material for: The synergistic effect of the PEO–PVA–PESf composite polymer electrolyte for all-solid-state lithium-ion batteries
Source: Royal Society of Chemistry journal article supplement (doi:10.1039/c9ra09645k), 2020-01-01
Supplement: c9ra09645k1.pdf [file c9ra09645k1.pdf]

## Supporting Information

### **Synergistic Effect of PEO-PVA-PESf Composite Polymer Electrolyte for All Solid-State Lithium-Ion Batteries**

*Ling Xu, Kaiyuan Wei, Yong Cao, Shiping Ma, Jian Li, Yu Zhao\*, Yixiu Cui, Yanhua*

*Cui\**

*Institute of Electronic Engineering, China Academy of Engineering Physics,*

*Mianyang, Sichuan, 621000, P. R. China*

\* Corresponding author: Yanhua Cui

E-mail: [cuiyanhua@netease.com](mailto:cuiyanhua@netease.com)

\* Corresponding author: Yu Zhao

E-mail: [yzhao@caep.cn](mailto:yzhao@caep.cn)

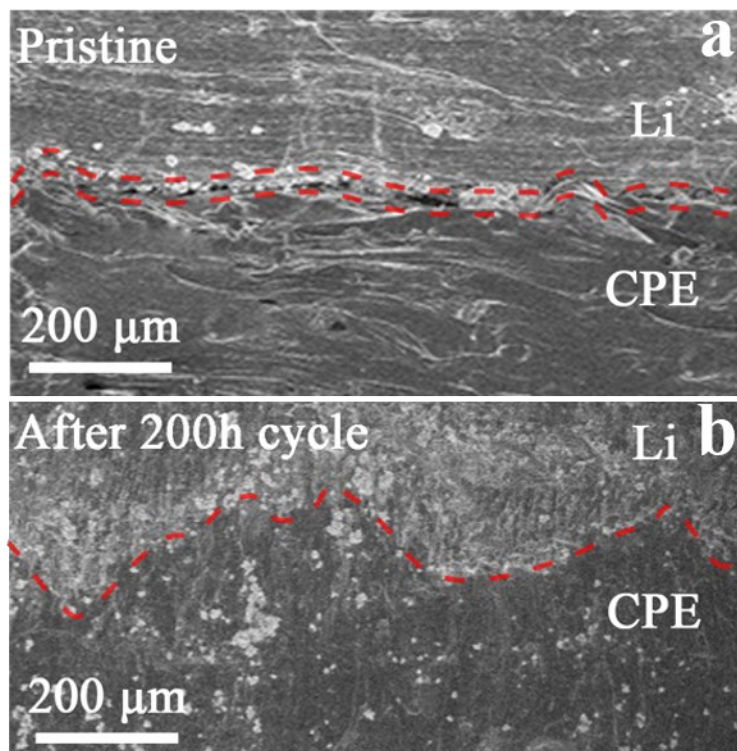

**Fig. S1.** The cross-sectional SEM images of the lithium metal and CPE before (a) and after 200 hours cycling (b) in the symmetrical cell.
